# Supplementary material for: Theoretical study on nitrobenzene hydrogenation to aniline catalyzed by M1/CeO2−x(111) single-atom catalysts
Source: Royal Society of Chemistry journal article supplement (doi:10.1039/d4cp04459b), 2025-01-01
Supplement: d4cp04459b1.pdf [file d4cp04459b1.pdf]

## Supplementary Information

### **Theoretical study on nitrobenzene hydrogenation to aniline catalyzed by $M_1/CeO_{2-x}(111)$ single-atom catalysts**

Haohao Wang <sup>a</sup>, Min Pu <sup>a</sup>, Ming Lei <sup>a\*</sup>

<sup>a</sup> State Key Laboratory of Chemical Resource Engineering, Institute of Computational Chemistry, College of Chemistry, Beijing University of Chemical Technology, Beijing 100029, China

\*Email: leim@mail.buct.edu.cn (Ming Lei)

## Table of Contents

|                 |                                                                                                                                                                                                                                                                                                                                                                                                                            |    |
|-----------------|----------------------------------------------------------------------------------------------------------------------------------------------------------------------------------------------------------------------------------------------------------------------------------------------------------------------------------------------------------------------------------------------------------------------------|----|
| <b>Fig. S1</b>  | The side and top view structures of $M_1/\text{CeO}_2(111)$ surfaces.....                                                                                                                                                                                                                                                                                                                                                  | S1 |
| <b>Fig. S2</b>  | Density of states (DOS) of $M_1/\text{CeO}_2(111)$ surfaces. ....                                                                                                                                                                                                                                                                                                                                                          | S2 |
| <b>Fig. S3</b>  | Charge density difference of $M_1/\text{CeO}_2(111)$ surfaces, the data in the figure are the Bader charges ( $q_M$ ) of the doped metals, with the unit $ e $ (the isosurface value was set to be $0.005 e/\text{\AA}$ ). ....                                                                                                                                                                                            | S3 |
| <b>Fig. S4</b>  | The side and top view structures of $M_1/\text{CeO}_{2-x}(111)$ surfaces.....                                                                                                                                                                                                                                                                                                                                              | S4 |
| <b>Fig. S5</b>  | The spin density of $M_1/\text{CeO}_{2-x}(111)$ surfaces, the data in the figure are magnetic moments, with the unit $\mu_B$ (the isosurface value was set to be $0.005 e/\text{\AA}$ ).....                                                                                                                                                                                                                               | S5 |
| <b>Fig. S6</b>  | The side and top view structures of $\text{H}_2$ adsorption on $M_1/\text{CeO}_{2-x}(111)$ surfaces.....                                                                                                                                                                                                                                                                                                                   | S6 |
| <b>Table S1</b> | Atomic radius ( $r_M$ ), average M-O bond length ( $d_{M-O}$ ), Bader charge ( $q_M$ ), magnetic moment ( $Mag_M$ ), $d$ -band center ( $\epsilon d_{-M}$ ) of doped metal atoms in $M_1/\text{CeO}_2(111)$ and $M_1/\text{CeO}_{2-x}(111)$ surfaces, the binding energies ( $E_b$ ), the cohesive energies ( $E_{coh}$ ) and the oxygen vacancy formation energies ( $E_{ov}$ ) of $M_1/\text{CeO}_2(111)$ surfaces. .... | S7 |
| <b>Note S1</b>  | The thermodynamics of the uncatalyzed reaction.. ....                                                                                                                                                                                                                                                                                                                                                                      | S8 |

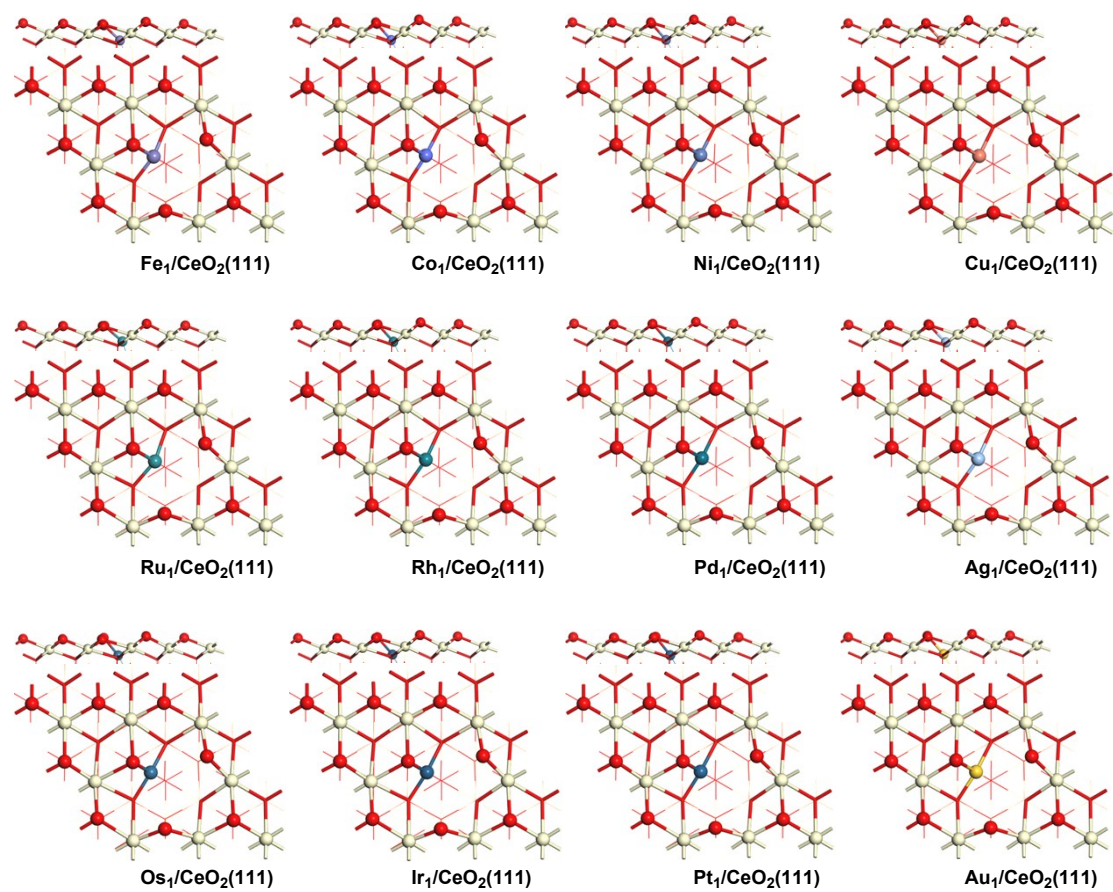

**Fig. S1** The side and top view structures of  $\text{M}_1/\text{CeO}_2(111)$  surfaces.

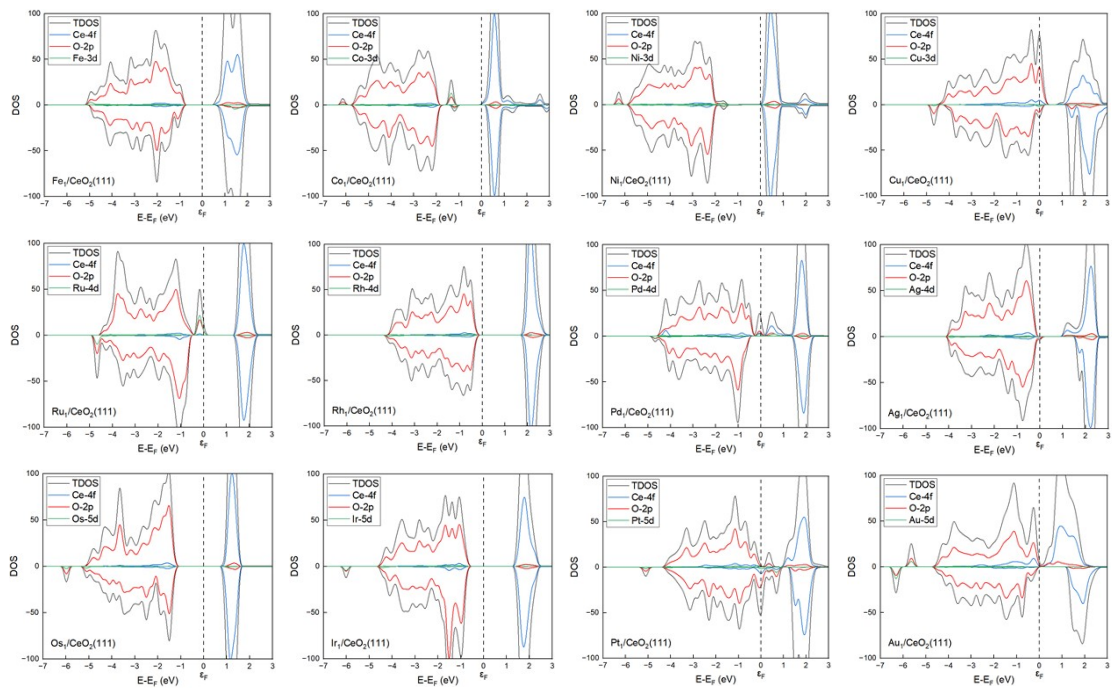

**Fig. S2** Density of states (DOS) of  $M_1/\text{CeO}_2(111)$  surfaces.

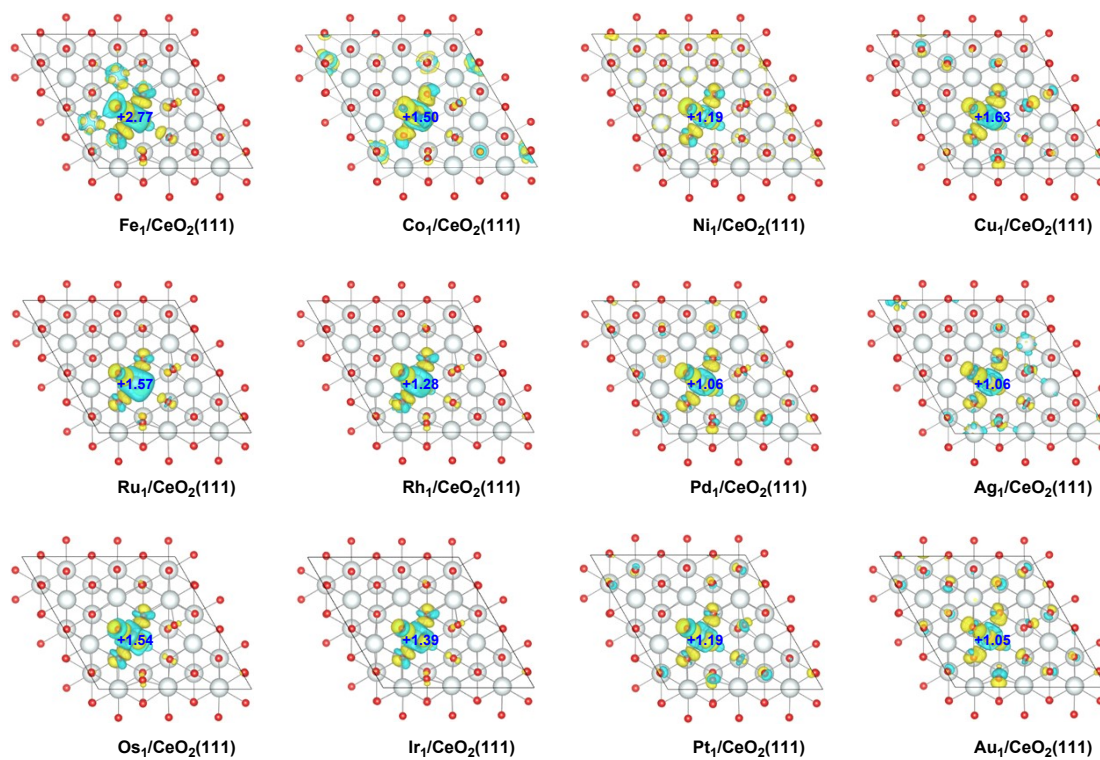

**Fig. S3** Charge density difference of  $M_1/\text{CeO}_2(111)$  surfaces, the data in the figure are the Bader charges ( $q_M$ ) of the doped metals, with the unit  $|e|$  (the isosurface value was set to be  $0.005 \text{ e}/\text{\AA}$ ).

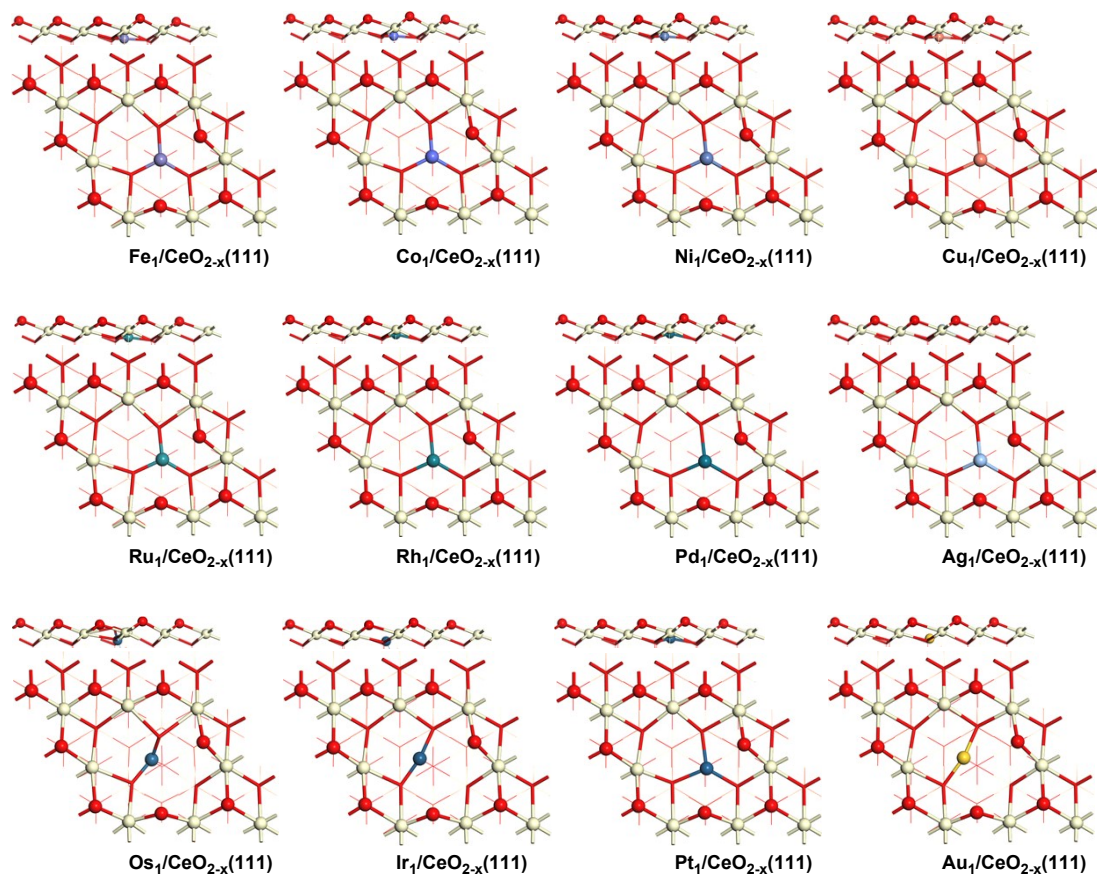

**Fig. S4** The side and top view structures of  $\text{M}_1/\text{CeO}_{2-x}(111)$  surfaces.

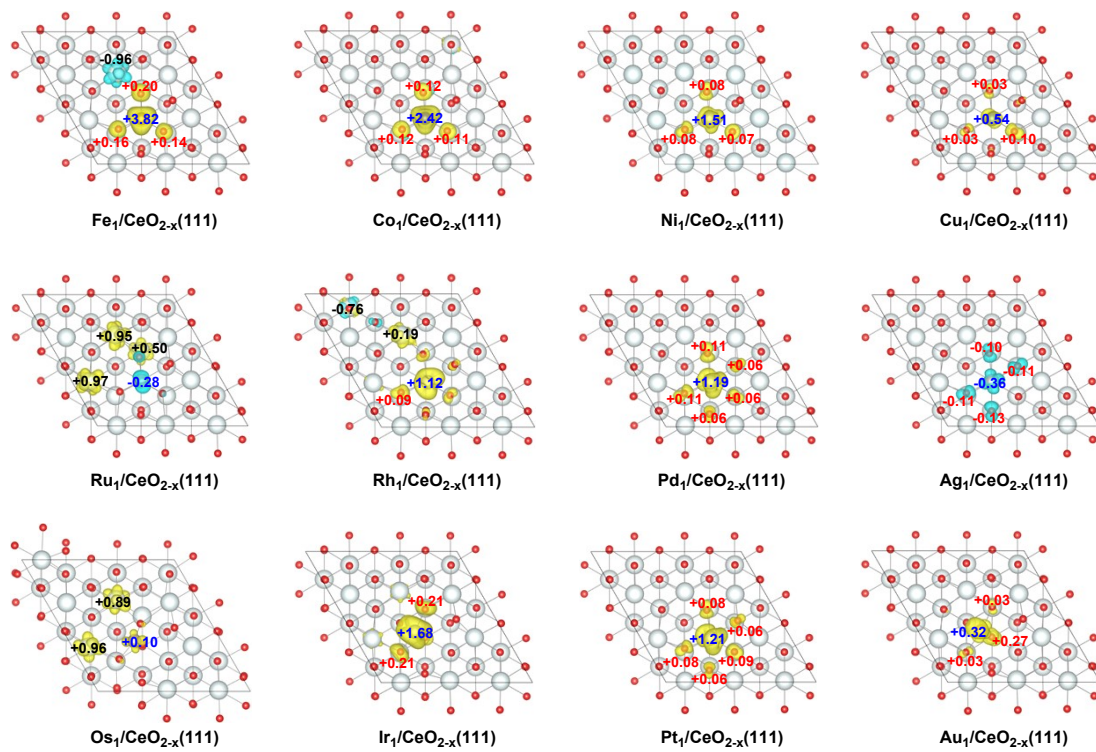

**Fig. S5** The spin density of  $M_1/CeO_{2-x}(111)$  surfaces, the data in the figure are magnetic moments, with the unit  $\mu_B$  (the isosurface value was set to be  $0.005 e/\text{\AA}$ ).

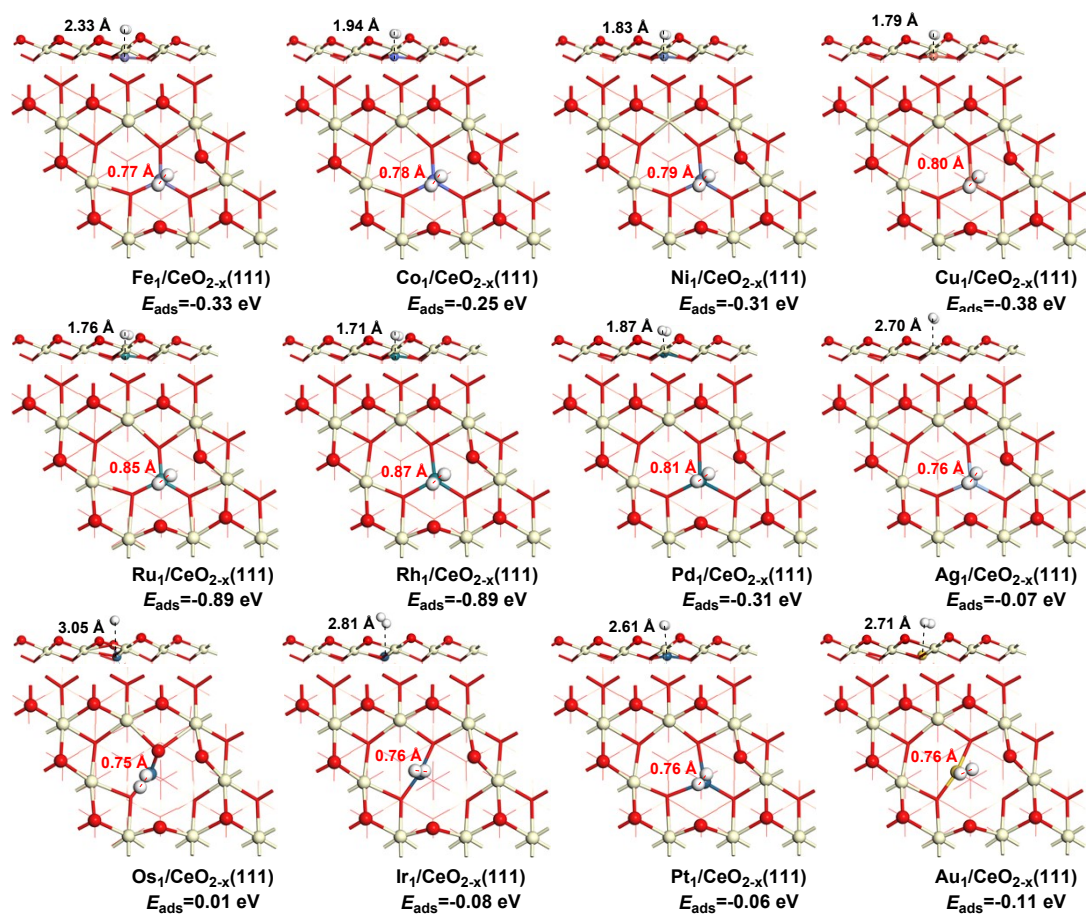

**Fig. S6** The side and top view structures of  $\text{H}_2$  adsorption on  $\text{M}_1/\text{CeO}_{2-x}(111)$  surfaces.



**Table S1** Atomic radius ( $r_M$ ), average M-O bond length ( $d_{M-O}$ ), Bader charge ( $q_M$ ), magnetic moment ( $Mag_M$ ),  $d$ -band center ( $\epsilon d_{-M}$ ) of doped metal atoms in  $M_1/CeO_2(111)$  and  $M_1/CeO_{2-x}(111)$  surfaces, the binding energies ( $E_b$ ), the cohesive energies ( $E_{coh}$ ) and the oxygen vacancy formation energies ( $E_{ov}$ ) of  $M_1/CeO_2(111)$  surfaces.

| M  | $M_1/CeO_2(111)$ |                  |                |                        |                           |               |                   | $M_1/CeO_{2-x}(111)$ |                |                        |                           |                  |
|----|------------------|------------------|----------------|------------------------|---------------------------|---------------|-------------------|----------------------|----------------|------------------------|---------------------------|------------------|
|    | $r_M$<br>(Å)     | $d_{M-O}$<br>(Å) | $q_M$<br>( e ) | $Mag_M$<br>( $\mu_B$ ) | $\epsilon d_{-M}$<br>(eV) | $E_b$<br>(eV) | $E_{coh}$<br>(eV) | $d_{M-O}$<br>(Å)     | $q_M$<br>( e ) | $Mag_M$<br>( $\mu_B$ ) | $\epsilon d_{-M}$<br>(eV) | $E_{ov}$<br>(eV) |
| Fe | 1.24             | 1.83             | 2.77           | 3.24                   | -1.62                     | 7.69          | 4.95              | 1.92                 | 1.49           | 3.82                   | -3.06                     | 1.44             |
| Co | 1.25             | 1.79             | 1.50           | 0.46                   | -2.30                     | 7.48          | 4.64              | 1.97                 | 1.29           | 2.42                   | -3.22                     | 1.46             |
| Ni | 1.25             | 1.82             | 1.19           | 0.96                   | -3.14                     | 7.16          | 3.27              | 1.99                 | 1.12           | 1.51                   | -2.40                     | 0.88             |
| Cu | 1.28             | 1.86             | 1.63           | 0.15                   | -5.70                     | 6.09          | 2.23              | 2.03                 | 1.04           | 0.54                   | -2.46                     | 0.63             |
| Ru | 1.33             | 1.94             | 1.57           | 2.64                   | -2.12                     | 7.69          | 6.68              | 1.89                 | 1.65           | -0.28                  | -5.03                     | 1.79             |
| Rh | 1.35             | 1.91             | 1.28           | 1.62                   | -3.36                     | 7.33          | 4.05              | 2.16                 | 1.18           | 1.12                   | -3.92                     | 2.14             |
| Pd | 1.38             | 1.95             | 1.06           | 0.70                   | -2.68                     | 5.89          | 2.25              | 2.21                 | 0.89           | 1.19                   | -3.10                     | 1.10             |
| Ag | 1.44             | 2.00             | 1.06           | -0.01                  | -2.48                     | 4.65          | 1.59              | 2.44                 | 0.87           | -0.36                  | -2.53                     | -0.06            |
| Os | 1.34             | 1.89             | 1.54           | 1.30                   | -5.80                     | 9.18          | 4.93              | 2.11                 | 1.31           | 0.10                   | -4.87                     | 3.16             |
| Ir | 1.36             | 1.91             | 1.39           | 1.65                   | -4.45                     | 9.59          | 3.39              | 2.27                 | 0.77           | 1.68                   | -1.93                     | 3.25             |
| Pt | 1.39             | 1.93             | 1.19           | 0.80                   | -1.51                     | 8.82          | 1.66              | 2.17                 | 0.89           | 1.21                   | -3.90                     | 2.67             |
| Au | 1.44             | 1.99             | 1.05           | 0.04                   | -4.86                     | 6.49          | 0.61              | 2.34                 | 0.62           | 0.32                   | -2.26                     | 1.22             |

**Note S1** The thermodynamics of the uncatalyzed reaction.

It is important to present the thermodynamics of the uncatalyzed reaction, especially for the conversion of PhNO<sub>2</sub> to PhNO, then to PhNHOH, and further to PhNH<sub>2</sub>. The relevant thermodynamic equations and Gibbs free energy changes ( $\Delta G$ ) for each step are listed below:

1. PhNO<sub>2</sub> to PhNO:

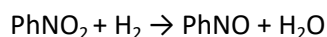

$$\Delta G_1 = G_{(\text{PhNO})} + G_{(\text{H}_2\text{O})} - G_{(\text{PhNO}_2)} - G_{(\text{H}_2)} = -83.46 + (-14.14) - (-89.93) - (-6.66) = -1.01 \text{ eV}$$

2. PhNO to PhNHOH:

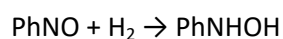

$$\Delta G_2 = G_{(\text{PhNHOH})} - G_{(\text{PhNO})} - G_{(\text{H}_2)} = -91.16 - (-83.46) - (-6.66) = -1.05 \text{ eV}$$

3. PhNHOH to PhNH<sub>2</sub>:

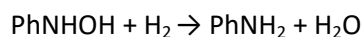

$$\Delta G_3 = G_{(\text{PhNH}_2)} + G_{(\text{H}_2\text{O})} - G_{(\text{PhNHOH})} - G_{(\text{H}_2)} = -86.21 + (-14.14) - (-91.16) - (-6.66) = -2.54 \text{ eV}$$

4. Overall reaction (PhNO<sub>2</sub> to PhNH<sub>2</sub>):

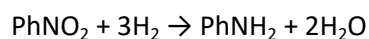

$$\Delta G = \Delta G_1 + \Delta G_2 + \Delta G_3 = G_{(\text{PhNH}_2)} + 2G_{(\text{H}_2\text{O})} - G_{(\text{PhNO}_2)} - 3G_{(\text{H}_2)} = -86.21 + 2*(-14.14) - (-89.93) - 3*(-6.66) = -4.60 \text{ eV}$$

Therefore, the uncatalyzed reaction of PhNO<sub>2</sub> to PhNO, then to PhNHOH, and further to PhNH<sub>2</sub> are exothermic. Overall, the uncatalyzed reaction of PhNO<sub>2</sub> to PhNH<sub>2</sub> is also exothermic, with a total Gibbs free energy change of -4.60 eV.
